# Supplementary material for: Recent advances on metal alkoxide-based electrocatalysts for water splitting
Source: Royal Society of Chemistry journal article supplement (doi:10.1039/d0ta03044a), 2020-01-01
Supplement: d0ta03044a1.pdf [file d0ta03044a1.pdf]

## Copies of permissions required from other publishers to reproduce figures

Elsevier

Ref. 55



**Facile self-template fabrication of hierarchical nickel-cobalt phosphide hollow nanoflowers with enhanced hydrogen generation performance**  
 Author: Xupo Liu, Shaofeng Deng, Peifang Liu, Jianing Liang, Mingxing Gong, Chenglong Lai, Yun Lu, Tonghui Zhao, Deli Wang  
 Publication: Science Bulletin  
 Publisher: Elsevier  
 Date: 30 November 2019  
© 2019 Science China Press. Published by Elsevier B.V. and Science China Press. All rights reserved.

**Order Completed**

Thank you for your order.

This Agreement between Huazhong University of Science and Technology -- Xupo Liu ("You") and Elsevier ("Elsevier") consists of your license details and the terms and conditions provided by Elsevier and Copyright Clearance Center.

Your confirmation email will contain your order number for future reference.

[Printable Details](#)

|                                     |                                                                                                                                           |                                                     |                                |
|-------------------------------------|-------------------------------------------------------------------------------------------------------------------------------------------|-----------------------------------------------------|--------------------------------|
| <b>License Number</b>               | 4806201469710                                                                                                                             |                                                     |                                |
| <b>License date</b>                 | Apr 11, 2020                                                                                                                              |                                                     |                                |
| <b>Licensed Content</b>             |                                                                                                                                           | <b>Order Details</b>                                |                                |
| <b>Licensed Content Publisher</b>   | Elsevier                                                                                                                                  | <b>Type of Use</b>                                  | reuse in a journal/magazine    |
| <b>Licensed Content Publication</b> | Science Bulletin                                                                                                                          | <b>Requestor type</b>                               | academic/educational institute |
| <b>Licensed Content Title</b>       | Facile self-template fabrication of hierarchical nickel-cobalt phosphide hollow nanoflowers with enhanced hydrogen generation performance | <b>Portion</b>                                      | figures/tables/illustrations   |
| <b>Licensed Content Author</b>      | Xupo Liu, Shaofeng Deng, Peifang Liu, Jianing Liang, Mingxing Gong, Chenglong Lai, Yun Lu, Tonghui Zhao, Deli Wang                        | <b>Number of figures/tables/illustrations</b>       | 1                              |
| <b>Licensed Content Date</b>        | Nov 30, 2019                                                                                                                              | <b>Format</b>                                       | both print and electronic      |
| <b>Licensed Content Volume</b>      | 64                                                                                                                                        | <b>Are you the author of this Elsevier article?</b> | Yes                            |
|                                     |                                                                                                                                           | <b>Will you be translating?</b>                     | No                             |
| <b>Licensed Content Issue</b>       | 22                                                                                                                                        |                                                     |                                |
| <b>Licensed Content Pages</b>       | 10                                                                                                                                        |                                                     |                                |
| <b>Journal Type</b>                 | S&T                                                                                                                                       |                                                     |                                |
| <b>About Your Work</b>              |                                                                                                                                           | <b>Additional Data</b>                              |                                |
| <b>Title of new article</b>         | Recent advances on metal alkoxide based electrocatalysts for water splitting                                                              | <b>Order reference number</b>                       | 55                             |
| <b>Lead author</b>                  | Xupo Liu                                                                                                                                  | <b>Portions</b>                                     | Fig. 1 on page 1678.           |
| <b>Title of targeted journal</b>    | Journal of Materials Chemistry A                                                                                                          |                                                     |                                |
| <b>Publisher</b>                    | Royal Society of Chemistry                                                                                                                |                                                     |                                |
| <b>Expected publication date</b>    | Apr 2020                                                                                                                                  |                                                     |                                |
| <b>Requestor Location</b>           |                                                                                                                                           | <b>Tax Details</b>                                  |                                |
|                                     | Huazhong University of Science and Technology<br>Luoyu Road 1037, Wuhan, China                                                            | <b>Publisher Tax ID</b>                             | GB 494 6272 12                 |
| <b>Requestor Location</b>           | Wuhan, 430074<br>China<br>Attn: Huazhong University of Science and Technology                                                             |                                                     |                                |
| <b>Price</b>                        |                                                                                                                                           |                                                     |                                |
| <b>Total</b>                        | 0.00 USD                                                                                                                                  |                                                     |                                |

## Ref. 103



**Synthesis of Cobalt–Glycerate hierarchical structure and their conversion into hierarchical CoP nanospheres for the hydrogen evolution reaction**

**Author:** Xiaosong Guo,Jun Liang,Liu Wang,Zijia Feng,Tongtong Yu,Zihao Zhang,Yalong Shao,Chunheng Hao,Guicun Li

**Publication:** International Journal of Hydrogen Energy

**Publisher:** Elsevier

**Date:** 25 January 2018

© 2017 Hydrogen Energy Publications LLC. Published by Elsevier Ltd. All rights reserved.

**Order Completed**

Thank you for your order.

This Agreement between Huazhong University of Science and Technology – Xupo Liu (“You”) and Elsevier (“Elsevier”) consists of your license details and the terms and conditions provided by Elsevier and Copyright Clearance Center.

Your confirmation email will contain your order number for future reference.

[Printable Details](#)

|                       |               |
|-----------------------|---------------|
| <b>License Number</b> | 4806260850955 |
| <b>License date</b>   | Apr 11, 2020  |

**Licensed Content**

|                                     |                                                                                                                                                 |
|-------------------------------------|-------------------------------------------------------------------------------------------------------------------------------------------------|
| <b>Licensed Content Publisher</b>   | Elsevier                                                                                                                                        |
| <b>Licensed Content Publication</b> | International Journal of Hydrogen Energy                                                                                                        |
| <b>Licensed Content Title</b>       | Synthesis of Cobalt–Glycerate hierarchical structure and their conversion into hierarchical CoP nanospheres for the hydrogen evolution reaction |
| <b>Licensed Content Author</b>      | Xiaosong Guo,Jun Liang,Liu Wang,Zijia Feng,Tongtong Yu,Zihao Zhang,Yalong Shao,Chunheng Hao,Guicun Li                                           |
| <b>Licensed Content Date</b>        | Jan 25, 2018                                                                                                                                    |
| <b>Licensed Content Volume</b>      | 43                                                                                                                                              |
| <b>Licensed Content Issue</b>       | 4                                                                                                                                               |
| <b>Licensed Content Pages</b>       | 9                                                                                                                                               |
| <b>Journal Type</b>                 | S&T                                                                                                                                             |

**Order Details**

|                                                     |                                |
|-----------------------------------------------------|--------------------------------|
| <b>Type of Use</b>                                  | reuse in a journal/magazine    |
| <b>Requestor type</b>                               | academic/educational institute |
| <b>Portion</b>                                      | figures/tables/illustrations   |
| <b>Number of figures/tables/illustrations</b>       | 3                              |
| <b>Format</b>                                       | both print and electronic      |
| <b>Are you the author of this Elsevier article?</b> | No                             |
| <b>Will you be translating?</b>                     | No                             |

**About Your Work**

|                                  |                                                                              |
|----------------------------------|------------------------------------------------------------------------------|
| <b>Title of new article</b>      | Recent advances on metal alkoxide based electrocatalysts for water splitting |
| <b>Lead author</b>               | Xupo Liu                                                                     |
| <b>Title of targeted journal</b> | Journal of Materials Chemistry A                                             |
| <b>Publisher</b>                 | Royal Society of Chemistry                                                   |
| <b>Expected publication date</b> | Apr 2020                                                                     |

**Requestor Location**

|                           |                                                                                |
|---------------------------|--------------------------------------------------------------------------------|
|                           | Huazhong University of Science and Technology<br>Luoyu Road 1037, Wuhan, China |
| <b>Requestor Location</b> | Wuhan, 430074<br>China<br>Attn: Huazhong University of Science and Technology  |

**Price**

|              |          |
|--------------|----------|
| <b>Total</b> | 0.00 USD |
|--------------|----------|

**Additional Data**

|                               |                                                               |
|-------------------------------|---------------------------------------------------------------|
| <b>Order reference number</b> | 103                                                           |
| <b>Portions</b>               | Fig. 4 on page 2038, Fig. 6 on page 2039, Fig. 8 on page 2040 |

**Tax Details**

|                         |                |
|-------------------------|----------------|
| <b>Publisher Tax ID</b> | GB 494 6272 12 |
|-------------------------|----------------|

## Ref. 104



**Self-assembly of nickel phosphate-based nanotubes into two-dimensional crumpled sheet-like architectures for high-performance asymmetric supercapacitors**

**Author:** Ni Luh Wulan Septiani,Yusuf Valentino Kaneti,Kresna Bondan Fathoni,Ijie Wang,Yusuke Ide,Brian Yulianto, Nugraha,Hermawan Kresno Dipojono,Ashok Kumar Nanjundan,Dmitri Golberg,Yoshio Bando,Yusuke Yamauchi

**Publication:** Nano Energy

**Publisher:** Elsevier

**Date:** January 2020

© 2019 Elsevier Ltd. All rights reserved.

**Order Completed**

Thank you for your order.

This Agreement between Huazhong University of Science and Technology – Xupo Liu (“You”) and Elsevier (“Elsevier”) consists of your license details and the terms and conditions provided by Elsevier and Copyright Clearance Center.

Your confirmation email will contain your order number for future reference.

[Printable Details](#)

|                       |               |
|-----------------------|---------------|
| <b>License Number</b> | 4806211402115 |
| <b>License date</b>   | Apr 11, 2020  |

**Licensed Content**

|                                     |                                                                                                                                                                                                            |
|-------------------------------------|------------------------------------------------------------------------------------------------------------------------------------------------------------------------------------------------------------|
| <b>Licensed Content Publisher</b>   | Elsevier                                                                                                                                                                                                   |
| <b>Licensed Content Publication</b> | Nano Energy                                                                                                                                                                                                |
| <b>Licensed Content Title</b>       | Self-assembly of nickel phosphate-based nanotubes into two-dimensional crumpled sheet-like architectures for high-performance asymmetric supercapacitors                                                   |
| <b>Licensed Content Author</b>      | Ni Luh Wulan Septiani,Yusuf Valentino Kaneti,Kresna Bondan Fathoni,Ijie Wang,Yusuke Ide,Brian Yulianto, Nugraha,Hermawan Kresno Dipojono,Ashok Kumar Nanjundan,Dmitri Golberg,Yoshio Bando,Yusuke Yamauchi |

**Order Details**

|                                                     |                                |
|-----------------------------------------------------|--------------------------------|
| <b>Type of Use</b>                                  | reuse in a journal/magazine    |
| <b>Requestor type</b>                               | academic/educational institute |
| <b>Portion</b>                                      | figures/tables/illustrations   |
| <b>Number of figures/tables/illustrations</b>       | 1                              |
| <b>Format</b>                                       | both print and electronic      |
| <b>Are you the author of this Elsevier article?</b> | No                             |
| <b>Will you be translating?</b>                     | No                             |

Licensed Content Date Jan 1, 2020  
 Licensed Content Volume 67  
 Licensed Content Issue n/a  
 Licensed Content Pages 1  
 Journal Type S&T

#### About Your Work

Title of new article Recent advances on metal alkoxide based electrocatalysts for water splitting  
 Lead author Xupo Liu  
 Title of targeted journal Journal of Materials Chemistry A  
 Publisher Royal Society of Chemistry  
 Expected publication date Apr 2020

#### Requestor Location

Huazhong University of Science and Technology  
 Luoyu Road 1037, Wuhan, China  
 Requestor Location  
 Wuhan, 430074  
 China  
 Attn: Huazhong University of Science and Technology

#### Price

Total 0.00 USD

#### Additional Data

Order reference number 104  
 Portions Fig. 2 on page 104270(5)

#### Tax Details

Publisher Tax ID GB 494 6272 12

Ref. 106

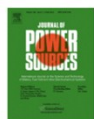

#### In situ growth of ruthenium oxide-nickel oxide nanorod arrays on nickel foam as a binder-free integrated cathode for hydrogen evolution

Author: Li Zhang, Kun Xiong, Siguo Chen, Li Li, Zihua Deng, Zidong Wei  
 Publication: Journal of Power Sources  
 Publisher: Elsevier  
 Date: 15 January 2015

Copyright © 2014 Elsevier B.V. All rights reserved.

#### Order Completed

Thank you for your order.

This Agreement between Huazhong University of Science and Technology – Xupo Liu ("You") and Elsevier ("Elsevier") consists of your license details and the terms and conditions provided by Elsevier and Copyright Clearance Center.

Your confirmation email will contain your order number for future reference.

License Number 4806221073116  
 License date Apr 11, 2020

[Printable Details](#)

#### Licensed Content

Licensed Content Publisher Elsevier  
 Licensed Content Publication Journal of Power Sources  
 Licensed Content Title In situ growth of ruthenium oxide-nickel oxide nanorod arrays on nickel foam as a binder-free integrated cathode for hydrogen evolution  
 Licensed Content Author Li Zhang, Kun Xiong, Siguo Chen, Li Li, Zihua Deng, Zidong Wei  
 Licensed Content Date Jan 15, 2015  
 Licensed Content Volume 274  
 Licensed Content Issue n/a  
 Licensed Content Pages 7  
 Journal Type S&T

#### Order Details

Type of Use reuse in a journal/magazine  
 Requestor type academic/educational institute  
 Portion figures/tables/illustrations  
 Number of figures/tables/illustrations 3  
 Format both print and electronic  
 Are you the author of this Elsevier article? No  
 Will you be translating? No

#### About Your Work

Title of new article Recent advances on metal alkoxide based electrocatalysts for water splitting  
 Lead author Xupo Liu  
 Title of targeted journal Journal of Materials Chemistry A  
 Publisher Royal Society of Chemistry  
 Expected publication date Apr 2020

#### Requestor Location

Huazhong University of Science and Technology  
 Luoyu Road 1037, Wuhan, China  
 Requestor Location  
 Wuhan, 430074  
 China  
 Attn: Huazhong University of Science and Technology

#### Price

Total 0.00 USD

#### Additional Data

Order reference number 106  
 Portions Fig. 1 on page 115, Fig. 2 on page 116, Fig. 6 on page 119

#### Tax Details

Publisher Tax ID GB 494 6272 12

## American Chemical Society

Ref. 92



**Layered Bimetallic Iron–Nickel Alkoxide Microspheres as High-Performance Electrocatalysts for Oxygen Evolution Reaction in Alkaline Media**

Author: Mei Wang, Jing Jiang, Lunhong Ai  
Publication: ACS Sustainable Chemistry & Engineering  
Publisher: American Chemical Society  
Date: May 1, 2018  
*Copyright © 2018, American Chemical Society*

**PERMISSION/LICENSE IS GRANTED FOR YOUR ORDER AT NO CHARGE**

This type of permission/license, instead of the standard Terms & Conditions, is sent to you because no fee is being charged for your order. Please note the following:

- Permission is granted for your request in both print and electronic formats, and translations.
- If figures and/or tables were requested, they may be adapted or used in part.
- Please print this page for your records and send a copy of it to your publisher/graduate school.
- Appropriate credit for the requested material should be given as follows: "Reprinted (adapted) with permission from (COMPLETE REFERENCE CITATION). Copyright (YEAR) American Chemical Society." Insert appropriate information in place of the capitalized words.
- One-time permission is granted only for the use specified in your request. No additional uses are granted (such as derivative works or other editions). For any other uses, please submit a new request.

If credit is given to another source for the material you requested, permission must be obtained from that source.

Ref. 128



**Sulfurizing-Induced Hollowing of Co<sub>9</sub>S<sub>8</sub> Microplates with Nanosheet Units for Highly Efficient Water Oxidation**

Author: Huan Liu, Fei-Xiang Ma, Cheng-Yan Xu, et al  
Publication: Applied Materials  
Publisher: American Chemical Society  
Date: Apr 1, 2017  
*Copyright © 2017, American Chemical Society*

**PERMISSION/LICENSE IS GRANTED FOR YOUR ORDER AT NO CHARGE**

This type of permission/license, instead of the standard Terms & Conditions, is sent to you because no fee is being charged for your order. Please note the following:

- Permission is granted for your request in both print and electronic formats, and translations.
- If figures and/or tables were requested, they may be adapted or used in part.
- Please print this page for your records and send a copy of it to your publisher/graduate school.
- Appropriate credit for the requested material should be given as follows: "Reprinted (adapted) with permission from (COMPLETE REFERENCE CITATION). Copyright (YEAR) American Chemical Society." Insert appropriate information in place of the capitalized words.
- One-time permission is granted only for the use specified in your request. No additional uses are granted (such as derivative works or other editions). For any other uses, please submit a new request.

If credit is given to another source for the material you requested, permission must be obtained from that source.

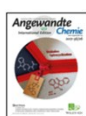

### Self-Templated Formation of Uniform NiCo<sub>2</sub>O<sub>4</sub> Hollow Spheres with Complex Interior Structures for Lithium-Ion Batteries and Supercapacitors

Author: Xiong Wen (David) Lou, Xiaogang Zhang, Xin-Yao Yu, et al

Publication: Angewandte Chemie International Edition

Publisher: John Wiley and Sons

Date: Dec 17, 2014

© 2015 WILEY-VCH Verlag GmbH & Co. KGaA, Weinheim

#### Order Completed

Thank you for your order.

This Agreement between Huazhong University of Science and Technology -- Xupo Liu ("You") and John Wiley and Sons ("John Wiley and Sons") consists of your license details and the terms and conditions provided by John Wiley and Sons and Copyright Clearance Center.

Your confirmation email will contain your order number for future reference.

License Number 4806300710106

[Printable Details](#)

License date Apr 12, 2020

#### Licensed Content

Licensed Content Publisher John Wiley and Sons  
 Licensed Content Publication Angewandte Chemie International Edition  
 Licensed Content Title Self-Templated Formation of Uniform NiCo<sub>2</sub>O<sub>4</sub> Hollow Spheres with Complex Interior Structures for Lithium-Ion Batteries and Supercapacitors  
 Licensed Content Author Xiong Wen (David) Lou, Xiaogang Zhang, Xin-Yao Yu, et al  
 Licensed Content Date Dec 17, 2014  
 Licensed Content Volume 54  
 Licensed Content Issue 6  
 Licensed Content Pages 5

#### Order Details

Type of use Journal/Magazine  
 Requestor type University/Academic  
 Is the reuse sponsored by or associated with a pharmaceutical or medical products company? no  
 Format Print and electronic  
 Portion Figure/table  
 Number of figures/tables 2  
 Will you be translating? No  
 Circulation 1000 - 1999

#### About Your Work

Title of new article Recent advances on metal alkoxide based electrocatalysts for water splitting  
 Lead author Xupo Liu  
 Title of targeted journal Journal of Materials Chemistry A  
 Publisher Royal Society of Chemistry  
 Expected publication date Apr 2020

#### Additional Data

Order reference number 52  
 Portions Fig. 1 and Fig. 2 on page 1869

#### Requestor Location

Requestor Location Huazhong University of Science and Technology  
 Luoyu Road 1037, Wuhan, China  
 Wuhan, 430074  
 China  
 Attn: Huazhong University of Science and Technology

#### Tax Details

Publisher Tax ID EU826007151

#### Price

Total 0.00 USD



## Ref. 57



**Self-Assembled 3D Flowerlike Iron Oxide Nanostructures and Their Application in Water Treatment**  
 Author: L.-J. Wan, W.-G. Song, A.-M. Cao, et al  
 Publication: Advanced Materials  
 Publisher: John Wiley and Sons  
 Date: Sep 12, 2006  
 Copyright © 2006 WILEY-VCH Verlag GmbH & Co. KGaA, Weinheim

**Order Completed**

Thank you for your order.

This Agreement between Huazhong University of Science and Technology -- Xupo Liu ("You") and John Wiley and Sons ("John Wiley and Sons") consists of your license details and the terms and conditions provided by John Wiley and Sons and Copyright Clearance Center.

Your confirmation email will contain your order number for future reference.

License Number 4806290007490 [Printable Details](#)

License date Apr 12, 2020

**Licensed Content**

Licensed Content Publisher John Wiley and Sons  
 Licensed Content Publication Advanced Materials  
 Licensed Content Title Self-Assembled 3D Flowerlike Iron Oxide Nanostructures and Their Application in Water Treatment  
 Licensed Content Author L.-J. Wan, W.-G. Song, A.-M. Cao, et al  
 Licensed Content Date Sep 12, 2006  
 Licensed Content Volume 18  
 Licensed Content Issue 18  
 Licensed Content Pages 6

**Order Details**

Type of use Journal/Magazine  
 Requestor type University/Academic  
 Is the reuse sponsored by or associated with a pharmaceutical or medical products company? no  
 Format Print and electronic  
 Portion Figure/table  
 Number of figures/tables 1  
 Will you be translating? No  
 Circulation 1000 - 1999

**About Your Work**

Title of new article Recent advances on metal alkoxide based electrocatalysts for water splitting  
 Lead author Xupo Liu  
 Title of targeted journal Journal of Materials Chemistry A  
 Publisher Royal Society of Chemistry  
 Expected publication date Apr 2020

**Requestor Location**

Huazhong University of Science and Technology  
 Luoyu Road 1037, Wuhan, China

**Requestor Location**

Wuhan, 430074  
 China  
 Attn: Huazhong University of Science and Technology

**Price**

Total 0.00 USD

**Additional Data**

Order reference number 57  
 Portions Fig. 1 on page 2427

**Tax Details**

Publisher Tax ID EU826007151

## Ref. 118



**Holey Assembly of Two-Dimensional Iron-Doped Nickel-Cobalt Layered Double Hydroxide Nanosheets for Energy Conversion Application**  
 Author: Yusuke Yamauchi, Dmitri Golberg, Yoshiyuki Sugahara, et al  
 Publication: ChemSusChem  
 Publisher: John Wiley and Sons  
 Date: Aug 8, 2019  
 © 2019 Wiley-VCH Verlag GmbH & Co. KGaA, Weinheim

**Order Completed**

Thank you for your order.

This Agreement between Huazhong University of Science and Technology -- Xupo Liu ("You") and John Wiley and Sons ("John Wiley and Sons") consists of your license details and the terms and conditions provided by John Wiley and Sons and Copyright Clearance Center.

Your confirmation email will contain your order number for future reference.

License Number 4806350558749 [Printable Details](#)

License date Apr 12, 2020

**Licensed Content**

Licensed Content Publisher John Wiley and Sons  
 Licensed Content Publication ChemSusChem  
 Licensed Content Title Holey Assembly of Two-Dimensional Iron-Doped Nickel-Cobalt Layered Double Hydroxide Nanosheets for Energy Conversion Application  
 Licensed Content Author Yusuke Yamauchi, Dmitri Golberg, Yoshiyuki Sugahara, et al  
 Licensed Content Date Aug 8, 2019  
 Licensed Content Volume 13  
 Licensed Content Issue 6  
 Licensed Content Pages 11

**Order Details**

Type of use Journal/Magazine  
 Requestor type University/Academic  
 Is the reuse sponsored by or associated with a pharmaceutical or medical products company? no  
 Format Print and electronic  
 Portion Figure/table  
 Number of figures/tables 3  
 Will you be translating? No  
 Circulation 1000 - 1999

| About Your Work           |                                                                                | Additional Data        |                                                       |
|---------------------------|--------------------------------------------------------------------------------|------------------------|-------------------------------------------------------|
| Title of new article      | Recent advances on metal alkoxide based electrocatalysts for water splitting   | Order reference number | 118                                                   |
| Lead author               | Xupo Liu                                                                       | Portions               | Fig. 3 and Scheme 1 on page 1649, Fig. 6 on page 1651 |
| Title of targeted journal | Journal of Materials Chemistry A                                               |                        |                                                       |
| Publisher                 | Royal Society of Chemistry                                                     |                        |                                                       |
| Expected publication date | Apr 2020                                                                       |                        |                                                       |
| Requestor Location        |                                                                                | Tax Details            |                                                       |
|                           | Huazhong University of Science and Technology<br>Luoyu Road 1037, Wuhan, China | Publisher Tax ID       | EU826007151                                           |
| Requestor Location        | Wuhan, 430074<br>China<br>Attn: Huazhong University of Science and Technology  |                        |                                                       |
| \$ Price                  |                                                                                |                        |                                                       |
| Total                     | 0.00 USD                                                                       |                        |                                                       |

## Ref. 127

**Publisher:** John Wiley and Sons

© 2018 The Authors. Published by WILEY-VCH Verlag GmbH & Co. KGaA, Weinheim

### Open Access Article

This article is available under the terms of the Creative Commons Attribution License (CC BY) (which may be updated from time to time) and permits use, distribution and reproduction in any medium, provided that the Contribution is properly cited.

For an understanding of what is meant by the terms of the Creative Commons License, please refer to [Wiley's Open Access Terms and Conditions](#).

Permission is not required for this type of reuse.

Wiley offers a professional reprint service for high quality reproduction of articles from over 1400 scientific and medical journals. Wiley's reprint service offers:

- Peer reviewed research or reviews
- Tailored collections of articles
- A professional high quality finish
- Glossy journal style color covers
- Company or brand customisation
- Language translations
- Prompt turnaround times and delivery directly to your office, warehouse or congress.

Please contact our Reprints department for a quotation. Email [corporatesaleseurope@wiley.com](mailto:corporatesaleseurope@wiley.com) or [corporatesalesusa@wiley.com](mailto:corporatesalesusa@wiley.com) or [corporatesalesDE@wiley.com](mailto:corporatesalesDE@wiley.com).
